# Supplementary material for: Shifts in water column microbial composition associated to lakes with different trophic conditions: “Lagunas de Montebello” National Park, Chiapas, México
Source: PeerJ journal article supplement (doi:10.7717/peerj.13999), 2022-09-16
Supplement: S1_Table.pdf [file S1_Table.pdf]

**S1 Table. Land use difference between 1992 and 2014 for the LMNP\***

| <b>Land Use 2014</b> | <b>Ha</b>     | <b>Percentage<br/>(%)</b> |
|----------------------|---------------|---------------------------|
| Agriculture          | 1008.2        | 15.7                      |
| Human settlement     | 66.4          | 1                         |
| Forest               | 739           | 11.5                      |
| Body of water        | 999.1         | 15.6                      |
| Pasture land         | 349.8         | 5.5                       |
| Vegetation           | 3248.1        | 50.7                      |
| <b>PA Total</b>      | <b>6410.7</b> | <b>100</b>                |
| <b>Land Use 1992</b> | <b>Ha</b>     | <b>Percentage<br/>(%)</b> |
| Agriculture          | 146.6         | 2.3                       |
| Forest               | 5056.6        | 78.9                      |
| Body of water        | 653.2         | 10.2                      |
| Pasture land         | 554.3         | 8.6                       |
| <b>Total</b>         | <b>6410.7</b> | <b>100</b>                |

\*To calculate the percentages, the ArcGIS 10.5 program was used, where the land use layer corresponding to the years 1992 and 2014 was entered, later the area in hectares of the polygons was calculated by means of the "Calculate Geometry". The foregoing was done for the area covered by the LMNP. Finally, with the "Summarize" tool, the area of the polygons by attribute of Land Use was calculated, also in hectares.
