# Supplementary material for: Shifts in water column microbial composition associated to lakes with different trophic conditions: “Lagunas de Montebello” National Park, Chiapas, México
Source: PeerJ. 2022 Sep 16;10:e13999. doi: 10.7717/peerj.13999 (PMC9484458; doi:10.7717/peerj.13999)
Supplement: Supplemental Information 7 — Physical and chemical characteristics of the two main lake-types of the LMNP. [file peerj-10-13999-s007.xlsx]

## Sheet: PeerJ
San Lorenzo								Bosque Azul								La Encantada
Z (m)	Temp (℃)	DO (mg/L)	DO (%)	pH (units)	K25 (µS/cm)	Chl-a (μg/L)		Z (m)	Temp (℃)	DO (mg/L)	DO (%)	pH (units)	K25 (µS/cm)	Chl-a (μg/L)		Z (m)	Temp (℃)	DO (mg/L)	DO (%)	pH (units)	K25 (µS/cm)	Chl-a (μg/L)
0	20.77	9.4	139.8	8.42	680.4	86.7291		0	21.26	11.17	167.7	8.5	473.4	37.8435		0	21.7	10.28	155.7	8.37	432.3	29.2738
1	20.32	8.67	127.9	8.28	682.1			1.2	20.32	9.12	134.4	8.33	480.5			0.9	20.51	12	177.4	8.48	429.4
2	19.98	7.61	111.5	8.1	681.7	76.8698		2.2	19.42	7.65	110.7	8.12	487.1			1.9	19.54	11.25	163.2	8.33	447.8
3	19.71	6.46	94.1	7.94	683.7			3.1	19.3	7.63	110.1	8.14	482.6			3	18.87	3.57	51	7.78	448.2
4	19.49	6.06	87.9	7.84	683.5			3.9	19.19	7.15	102.9	8.03	486.3			3.5	18.74	0.58	8.2	7.29	440.1	26.6915
5	19.47	6.08	88.1	7.84	683.1	69.0893		4.9	19.03	5.85	84	7.84	487.5	45.9723		5.1	18.53	0	0	7.24	433.4
6	19.27	5.12	73.9	7.72	682.3			5.9	18.9	5.11	73.1	7.71	486.1			6	18.52	0	0	7.22	434.4
7	19.27	5.07	73.2	7.71	682.1			6.9	18.62	1.6	19.9	7.46	486.9			7	18.5	0	0	7.21	435.3
8	19.25	4.77	68.9	7.67	681.4			7.9	18.33	0	0	7.36	509.9			8.1	18.49	0	0	7.2	435.5
9	19.19	4.19	60.3	7.61	682			8.9	18.08	0	0	7.3	522.6			9.1	18.47	0	0	7.19	436.7
10	19.07	2.47	35.5	7.49	683	54.311		9.8	17.87	0	0	7.23	522	6.3552		10.1	18.41	0	0	7.17	438.4	6.0617
11	19.04	2.21	31.7	7.47	682.7			11	17.84	0	0	7.19	517.9			15	18.25	0	0	7.1	441.2
12	19	1.94	27.8	7.44	683.3			11.9	17.79	0	0	7.17	516.1			20	18.22	0	0	7.06	443.1
13	18.93	0.06	0.8	7.35	686.2			12.9	17.77	0	0	7.15	516.1			25	18.2	0	0	6.95	444.8	1.88865
14	18.85	0	0	7.32	687.6			14	17.76	0	0	7.14	515.8			30	18.18	0	0	6.89	446.7
15	18.85	0	0	7.32	687.6			15	17.76	0	0	7.15	517			35.1	18.17	0	0	6.85	449.1
20	18.83	0	0	7.29	689.1	30.7854		15.9	17.75	0	0	7.15	515			35.2	18.16	0	0	6.86	448.5
21	18.81	0	0	7.28	690.5			16.9	17.74	0	0	7.14	516.4			39.9	18.15	0	0	6.86	450.5
22	18.81	0	0	7.28	690			17.9	17.74	0	0	7.14	516.9			44.9	18.13	0	0	6.85	455.6	2.33519
								18.9	17.74	0	0	7.14	517.4			50	18.09	0	0	6.84	467.7
								19.9	17.73	0	0	7.13	516.7	2.71224		55	18.05	0	0	6.79	484.4
								20.9	17.73	0	0	7.13	518.4			60	18.04	0	0	6.82	490
								21.9	17.73	0	0	7.13	518.2			65	18.03	0	0	6.83	488.9
								22.9	17.72	0	0	7.13	517.2			70.1	18.03	0	0	6.87	489.1
								24.1	17.72	0	0	7.13	518.9			71	18.03	0	0	6.89	490.4
								24.9	17.71	0	0	7.12	518.7
								29.9	17.69	0	0	7.11	518.8
								35	17.67	0	0	7.1	522.6	1.60967
								36	17.67	0	0	7.1	523.1
								37	17.66	0	0	7.1	523.5
								37.6	17.67	0	0	6.91	592.2
Esmeralda								Agua Tinta								Ensueño
Z (m)	Temp (℃)	DO (mg/L)	DO (%)	pH (units)	K25 (µS/cm)	Chl-a (μg/L)		Z (m)	Temp (℃)	DO (mg/L)	DO (%)	pH (units)	K25 (µS/cm)	Chl-a (μg/L)		Z (m)	Temp (℃)	DO (mg/L)	DO (%)	pH (units)	K25 (µS/cm)	Chl-a (μg/L)
0	24.18	7.07	112.4	7.91	403.6	0.402527		0	23.56	7.13	111.9	8.17	355.2	0.440649		0	22.3	7.26	111.3	8.08	278.7	0.258035
1.1	21.82	7.16	108.7	7.88	401.7			1	22.35	7.45	114.3	8.13	355.1			1.1	20.99	7.53	112.5	8.12	278.6
2.1	21.65	7.03	106.3	7.85	400.9			2	22.16	7.43	113.5	8.07	353.7			2.1	20.88	7.52	112	8.13	277.9
3.1	21.52	6.87	103.7	7.81	400.6	0.557413		3.2	22.06	7.45	113.7	8.05	354.1			3	20.84	7.53	112	8.08	277.6
								4.1	21.89	7.48	113.6	8.04	352.8			4.1	20.83	7.51	111.7	8.13	277.4
								4.9	21.81	7.47	113.4	8	353.1	0.498369		5.1	20.79	7.49	111.4	8.1	277.5	0.266137
								6.1	21.72	7.5	113.7	8	352.4			6	20.78	7.48	111.2	8.04	278.3
								7.1	21.58	7.53	113.8	7.98	352.7			7	20.76	7.46	110.8	8.03	278.7
								8.1	21.5	7.52	113.5	8.02	353.7			8	20.74	7.46	110.8	8.01	278
								9.1	21.42	7.51	113	8.02	353.1			9	20.71	7.48	111	8.03	277.8
								10	21.38	7.49	112.7	8.02	353.2	0.503227		10	20.68	7.5	111.3	8.02	277.9	0.244593
								11.2	21.32	7.45	112	7.99	353.4			10.9	20.65	7.5	111.2	8.04	278.2
								12	21.26	7.47	112.2	7.99	352.8			11.9	20.63	7.52	111.4	8.01	277.3
								12.9	21.21	7.47	112	7.99	352.6			13	20.61	7.51	111.2	8	278
								13.9	21.16	7.41	111	7.97	353.4			13.9	20.59	7.49	110.9	8.02	278
								14.8	21.12	7.3	109.3	7.93	352.1	0.720337		15	20.58	7.49	110.9	8.01	277.4
								15.9	20.95	6.65	99.2	7.82	354			16	20.56	7.5	110.9	8.01	278.1
								17	20.7	5.04	74.8	7.63	356.3			17.1	20.55	7.49	110.8	8	277.2
								18.2	20.5	3.59	53	7.49	357.5			18	20.51	7.49	110.7	7.99	277.7
								19.3	20.45	2.74	40.5	7.42	357.8			19	20.48	7.49	110.6	7.98	278.1
								20	20.38	1.67	24.7	7.34	357.7	1.78581		20	20.47	7.5	110.7	7.98	276.6	0.295716
								20.5	20.37	1.37	20.3	7.3	358.4			20.9	20.45	7.49	110.6	7.96	277.9
								22.1	20.36	1.18	17.4	7.27	358.4			21.9	20.43	7.47	110.2	7.95	276.8
																22.9	20.42	7.42	109.5	7.93	277.6
																24	20.4	7.39	109.1	7.93	277.7
																24.9	20.38	7.35	108.4	7.89	278.4
																26.1	20.31	6.78	99.9	7.78	278.3
																27	20.24	6.27	92.2	7.7	279.5
																28	20.19	5.66	83.1	7.62	279.9
																29	20.12	5.19	76.2	7.56	279.6
																30	20.08	4.73	69.3	7.53	279.8
																31	20.06	4.54	66.5	7.49	280.3
																32	20.04	4.23	61.9	7.45	280.9
																33	20.04	4.04	59.2	7.44	280.6
																34	20.04	3.97	58.1	7.44	280.9	0.371198
																35	20.04	3.8	55.7	7.42	281.3
																35.4	20.04	3.03	44.3	7.24	300.9
Montebello								Tziscao								Cinco Lagos
Z (m)	Temp (℃)	DO (mg/L)	DO (%)	pH (units)	K25 (µS/cm)	Chl-a (μg/L)		Z (m)	Temp (℃)	DO (mg/L)	DO (%)	pH (units)	K25 (µS/cm)	Chl-a (μg/L)		Z (m)	Temp (℃)	DO (mg/L)	DO (%)	pH (units)	K25 (µS/cm)	Chl-a (μg/L)
0	20.69	7.67	113.8	8.14	189.7	0.351261		0	20.78	7.71	114	8.26	271.5	0.368807		0	20.74	7.66	113.8	8.28	221.5	0.147267
1	20.55	7.68	113.6	8.13	188.9			1	20.77	7.72	114.2	8.27	270.8			1.1	20.58	7.74	114.6	8.23	221.8
2	20.39	7.68	113.3	8.12	188.7			2	20.76	7.79	114.6	8.25	270.7			2	20.44	7.74	114.2	8.21	221.6
3.1	20.2	7.67	112.7	8.09	188.2			3	20.7	7.79	114.2	8.26	270.2			3.1	20.31	7.75	114.2	8.19	221.1
4	20.19	7.68	112.7	8.11	189			4	20.65	7.83	114.2	8.26	270.3			4.1	20.18	7.77	114.1	8.18	220.7
5	20.15	7.68	112.7	8.1	188.1			5	20.56	7.88	114.4	8.26	270.3			5.1	20.07	7.78	113.9	8.16	220
6	19.95	7.73	113	8.11	188.4			6	20.54	7.9	114.5	8.26	270.3			6	19.92	7.85	114.6	8.13	219.7
7	19.82	7.72	112.6	8.1	187.8			7	20.26	7.89	114.1	8.26	269.7			6.9	19.79	7.87	114.7	8.12	220.7
8	19.61	7.72	112.1	8.08	187.5			8	20.12	7.88	113.8	8.26	269.1			7.9	19.75	7.87	114.6	8.11	220.6
9	19.5	7.73	112	8.1	187.6			9	19.83	7.87	113.6	8.26	268.6			9	19.7	7.85	114.2	8.12	219.6
10	19.42	7.75	112	8.1	187.6	0.431696		10	19.63	7.88	113.6	8.25	268.8			10	19.68	7.85	114.1	8.12	220.4
11	19.36	7.74	111.8	8.09	187.3			11	19.53	7.86	113.3	8.25	268.7			11	19.64	7.86	114.2	8.11	220.2
12	19.3	7.7	111	8.08	187.5			12	19.45	7.85	113.1	8.24	269			12	19.62	7.88	114.4	8.1	219.2
12.9	19.26	7.71	111.1	8.08	187.1			13	19.39	7.84	112.9	8.24	268.5			13	19.6	7.86	114.1	8.08	220.6
14	19.23	7.69	110.7	8.09	187.5			14	19.34	7.82	112.5	8.24	268.1			14	19.58	7.88	114.3	8.08	219.7
15	19.22	7.69	110.7	8.08	187			15	19.29	7.8	112.2	8.24	268.2	0.6272		15	19.56	7.88	114.2	8.07	219.9
16	19.2	7.67	110.3	8.08	187.6			16	19.27	7.76	111.5	8.23	268.3			16.1	19.54	7.88	114.2	8.06	219.6
17	19.17	7.65	110	8.09	188.3			17	19.26	7.72	110.7	8.23	268.4			17.1	19.52	7.9	114.5	8.05	219.4
18	19.14	7.63	109.7	8.08	188			18	19.23	7.67	110	8.23	268.1			18.1	19.51	7.87	114.1	8.03	219.8
19	19.11	7.62	109.4	8.07	187.4			19	19.19	7.6	109	8.23	268.4			19	19.49	7.9	114.3	8.01	219.7
20	19.04	7.36	105.5	8.04	187.7	0.588924		20	19.16	7.58	108.6	8.21	268.6			20.1	19.46	7.92	114.5	7.99	219.8	0.424779
21	19.01	7.27	104.2	8	188.2			21	19.11	7.55	108.2	8.22	268			21.2	19.45	7.89	114.2	7.99	219.5
22	18.99	7.16	102.6	7.94	187.5			22	19.07	7.55	108.3	8.21	267.8			22	19.45	7.9	114.2	7.99	219.4
23	18.98	7.1	101.8	7.92	186.9			23	19.05	7.48	107.1	8.21	268			23.2	19.43	7.89	114.1	7.97	219.6
24	18.95	7.01	100.3	7.88	187.6			24	19.02	7.45	106.7	8.2	268.6			24.1	19.42	7.9	114.2	7.95	219.9
25.1	18.8	6.21	88.7	7.73	187.8			25	19.01	7.31	104.6	8.19	267.7			25.1	19.41	7.9	114.2	7.95	219.8
26	18.52	4.66	66.2	7.47	189			26	19.01	7.17	102.5	8.17	268.1			26.1	19.41	7.91	114.3	7.93	219.2
27	18.25	3.01	42.4	7.28	189.8			27	18.99	6.9	98.6	8.16	268.1			27	19.4	7.91	114.3	7.91	218.8
28	18.2	2.46	34.7	7.21	189.5			28	18.97	6.81	97.3	8.15	267.9			28.1	19.39	7.9	114.1	7.91	219.3
29	18.18	2.07	29.1	7.16	190.2			29	18.95	6.76	96.6	8.14	268.2			29.1	19.39	7.91	114.3	7.9	219.5
30	18.15	1.77	25	7.13	190.6	0.518158		30	18.93	6.76	96.5	8.13	268.1			30.1	19.38	7.89	113.9	7.89	219.3
31	18.15	1.77	24.9	7.09	190.8			31	18.89	6.7	95.7	8.11	268.2			31.1	19.37	7.86	113.7	7.88	220.1
32	18.15	1.72	24.3	7.07	190.4			32	18.85	6.67	95.1	8.08	268.9			32.1	19.36	7.87	113.6	7.83	218.9
33	18.15	1.62	22.8	7.07	190.8			33	18.84	6.42	91.6	8.07	269.5	0.748143		33	19.35	7.84	113.2	7.84	220
34	18.14	1.6	22.6	7.05	190.6			34	18.83	6.11	87	8.06	268.2			34	19.34	7.85	113.3	7.84	219.4
35	18.14	1.57	22.1	7.03	190			35	18.83	5.77	82.2	8.06	268.9			35	19.34	7.83	113.1	7.84	219.6
36	18.13	1.42	20	7.02	191			36	18.82	5.58	79.4	8.05	268.4			35.9	19.33	7.84	113.1	7.83	218.6
37	18.13	1.36	19.1	7.01	191.1			37	18.8	5.22	74.2	8.03	268.3			36.9	19.32	7.77	112.2	7.83	219.3
38	18.13	1.29	18.2	7.01	190.8			38	18.76	4.74	67.3	8	268.4			37.9	19.32	7.75	111.7	7.82	219
39	18.12	1.29	18.1	7	191			39	18.71	4.56	64.7	7.95	268.1			38.9	19.31	7.75	111.7	7.81	218.7
40	18.12	1.26	17.7	7	191.1	0.64398		40	18.67	4.2	59.6	7.92	268.3	0.800505		39.9	19.3	7.71	111.2	7.8	219.4
41	18.12	1.21	17.1	7	190.4			41	18.61	4.11	58.3	7.88	270.2			40.9	19.29	7.66	110.4	7.8	219.4
42	18.12	1.2	16.9	7	190.1			42	18.57	4.02	56.8	7.82	269.2			41.9	19.28	7.6	109.5	7.78	218.8
43.1	18.12	1.07	15	7	191.2			43	18.53	3.91	55.5	7.76	270.4			42.9	19.27	7.52	108.3	7.76	219.2
44	18.12	1.04	14.6	7	191.4			44	18.49	3.86	54.6	7.72	269.7			44	19.25	7.42	107	7.73	218.3
44.9	18.13	0.18	2.6	6.9	197.8			45	18.47	3.78	53.5	7.68	270.2	0.490567		44.9	19.22	7.05	101.4	7.68	219.5
								46	18.47	3.59	50.9	7.67	269.8			46	19.18	6.86	98.7	7.64	220.3
								47	18.47	3.525	49.3	7.65	271.2			47.1	19.17	6.61	95	7.63	218.9
								48	18.47	3.421	47.45	7.64	270.3			48.1	19.15	6.44	92.6	7.61	219.7
								49	18.46	3.317	45.6	7.63	271.7			49.1	19.15	6.28	90.3	7.6	219.8
								50	18.46	3.213	43.75	7.61	269.9			50.1	19.13	6.13	88.1	7.59	220
								51	18.45	3.109	41.9	7.6	270.3			51	19.13	5.97	85.8	7.59	220.1
								52	18.46	3.005	40.05	7.26	378			52	19.12	5.84	83.9	7.58	220.4
																53	19.11	5.7	81.8	7.58	219.5
																54	19.07	5.69	81.7	7.56	221.3
																55	19.01	5.59	80.1	7.53	221.9	0.562162
																56	18.97	4.91	70.3	7.47	223.5
																56.8	18.92	4.14	59.3	7.39	226.2
																57.9	18.85	3.41	48.7	7.31	229.6
																59	18.76	2.69	38.4	7.25	232.6
																60.1	18.7	2.38	33.9	7.23	232.2
																61.1	18.66	2.26	32.2	7.22	234
																62.1	18.6	1.83	26	7.2	235.8
																63	18.58	1.67	23.3	7.19	237.3
																63.9	18.56	1.39	19.7	7.18	236.9
																65	18.53	1.31	18.5	7.16	236.6
																66	18.51	1.23	17.4	7.16	236.7
																67.1	18.5	1.08	15.3	7.15	237.1
																68.1	18.47	0.96	13.6	7.14	237.2
																69.1	18.46	0.88	12.4	7.14	237.6
																70	18.44	0.76	10.7	7.13	238
																71.1	18.42	0.46	6.5	7.12	238.5
																72.1	18.41	0.16	2.3	7.13	238.3
																73.1	18.4	0	0	7.17	237.3
																74.1	18.39	0	0	7.17	238.3
																75.1	18.39	0	0	7.17	238.4
																80	18.37	0	0	7.17	241.2
																85.1	18.34	0	0	7.14	243.6	1.97914
																90.1	18.33	0	0	7.11	247.8
																94.9	18.33	0	0	7.09	249.6
																98.8	18.33	0	0	7.05	250.4
																100	18.33	0	0	7.05	250.4	0.448381
Pojoj								Dos Lagos								Kichail
Z (m)	Temp (℃)	DO (mg/L)	DO (%)	pH (units)	K25 (µS/cm)	Chl-a (μg/L)		Z (m)	Temp (℃)	DO (mg/L)	DO (%)	pH (units)	K25 (µS/cm)	Chl-a (μg/L)		Z (m)	Temp (℃)	DO (mg/L)	DO (%)	pH (units)	K25 (µS/cm)	Chl-a (μg/L)
0	21.31	7.49	112.6	8.37	218.3	0.158276		0	21.48	7.28	109.7	7.95	364.8	0.305948		0.1	22.58	7.62	117.5	8.26	284	0.607601
1.1	21.27	7.65	114.8	8.27	218.2			1	21.1	7.31	109.3	7.92	360.8			1.1	22.36	7.71	118.2	8.21	283.2
2	21.22	7.64	114.5	8.28	217.8			2	20.66	7.28	107.9	7.87	369.1			2	22.06	7.74	118	8.18	282.6
3.1	21.17	7.64	114.5	8.27	218.5			3	20.31	7.2	106.1	7.78	379.1			3.1	21.71	7.83	118.6	8.19	283
4	21.09	7.67	114.7	8.26	217.8			4	19.84	7.2	105	7.72	425.5			3.9	21.44	7.95	119.8	8.16	282.5
5.1	20.99	7.68	114.6	8.24	218.3			5	19.63	7.07	102.7	7.68	448.4			5	20.93	8.06	120.1	8.16	281.2	1.02832
6.1	20.8	7.74	115	8.22	217			6	19.43	7.04	101.8	7.66	456.8			5.9	20.54	8.1	119.8	8.18	280.3
7	20.72	7.74	114.9	8.19	217.3			7	19.36	6.77	97.8	7.55	488.8			6.9	20.39	8.1	119.4	8.17	280.3
8.1	20.68	7.76	115.1	8.16	217.4			8	19.51	5	72.5	7.33	659.6			7.9	20.24	8.04	118.2	8.14	280.3
9.1	20.6	7.76	114.9	8.17	217.8			9	19.64	3.42	49.7	7.15	791.5	0.616948		9	20.07	8.01	117.4	8.14	280.6
10.2	20.53	7.79	115.2	8.18	216.2	0.213399		10	19.63	2.81	40.9	7.08	807.1			9.8	19.93	7.95	116.2	8.12	280.6	1.31798
11	20.5	7.8	115.2	8.16	216.6			10.9	19.57	2.61	37.9	7.04	818.5			11	19.87	7.92	115.6	8.1	280.6
12	20.47	7.79	115	8.15	217.9			12	19.46	2.44	35.4	7	821.7			12.2	19.72	7.76	112.8	8.08	280.7
12.9	20.45	7.78	114.8	8.14	217.2			13	19.29	2.2	31.8	6.95	825.8			13.1	19.66	7.61	110.5	8.07	280.7
14	20.43	7.77	114.7	8.11	217.3			14	19.19	2.04	29.5	6.91	831.2			13.9	19.6	7.51	109	8.03	281.2
14.9	20.38	7.76	114.4	8.1	216.2			15	19.09	1.91	27.4	6.91	828.4			15	19.53	7.54	110.1	7.97	281.6	1.37303
15.9	20.35	7.77	114.4	8.12	217.6			16	19.06	1.77	25.5	6.9	840.1			15.9	19.47	7.57	111.2	7.88	282.2
16.9	20.33	7.77	114.4	8.14	217			17	19.01	1.58	22.7	6.87	843.3			16.9	19.22	7.6	112.3	7.43	289.1
17.9	20.31	7.79	114.6	8.13	217			18	18.92	1.49	21.3	6.85	839.2	1.17421		17.9	19.14	7.63	113.4	7.3	292.4
19	20.28	7.79	114.5	8.1	216.8			19	18.94	1.39	19.9	6.82	863.9			19	19.07	7.65	113.7	7.24	295.5
20	20.27	7.77	114.3	8.1	217.1			20.1	18.94	1.17	16.8	6.8	882.3			20	18.95	7.66	113.7	7.15	298.6
21.1	20.24	7.79	114.5	8.09	217			21.1	18.88	0.9	12.8	6.78	889			20.9	18.94	7.68	114	7.12	299.3	2.31445
22.1	20.22	7.77	114.2	8.09	216.5			22	18.85	0.69	9.9	6.78	900.7			22.2	18.92	7.69	114.1	7.07	309.3
23.1	20.2	7.78	114.3	8.07	216.3			22.9	18.82	0.71	10.1	6.77	904.5
24.1	20.19	7.79	114.3	8.07	216.2			24	18.77	0.45	6.5	6.77	921.6
25	20.18	7.79	114.4	8.06	216.7			25	18.77	0.17	2.5	6.77	948.3
26	20.17	7.78	114.2	8.04	215.8			25.9	18.74	0	0	6.78	974.8
26.9	20.17	7.78	114.3	8.04	216			27	18.68	0	0	6.87	990.9
27.9	20.16	7.77	114	8.03	215.6			27.9	18.68	0	0	6.88	1011
29	20.15	7.8	114.4	8.04	216.8			29	18.68	0	0	6.88	1037
30	20.14	7.77	114	8.02	215.6			30	18.66	0	0	6.86	1057	6.0552
31	20.13	7.77	114	8.01	216.4			35	18.63	0	0	6.74	1325
32.1	20.12	7.78	114	8	216.1			38	18.64	0	0	6.7	1451	1.10146
33.1	20.11	7.76	113.8	8	216.1			39.1	18.64	0	0	6.7	1473
34.1	20.1	7.78	114.1	7.99	216.2			39.5	18.64	0	0	6.7	1483
35	20.1	7.75	113.6	8	216.1
36	20.09	7.75	113.6	8	216
37	20.09	7.73	113.3	7.99	216.6
38	20.08	7.75	113.5	7.98	216.2
39	20.08	7.73	113.3	7.97	216.2
40	20.07	7.69	112.6	7.97	216.1	0.445795
41	20.07	7.69	112.7	7.96	216.2
42.1	20.06	7.65	112	7.95	216.2
43.1	20.06	7.6	111.3	7.95	216.1
44.1	20.05	7.56	110.7	7.94	215.8
45.1	20.04	7.53	110.3	7.94	215.9
46.1	20.03	7.5	109.9	7.95	216.2
47.1	20.02	7.44	108.9	7.93	215.9
48.1	20.01	7.36	107.8	7.92	215.7
49.1	20	7.31	106.9	7.93	215.9
50.1	19.95	7.22	105.5	8.01	215.7
51.1	19.91	6.89	100.6	8.02	216.4
52.1	19.89	6.65	97.1	8.01	216.6
53.1	19.85	6.58	96	7.99	216.2
54.1	19.82	6.37	92.9	7.96	216
55	19.79	6.28	91.5	7.94	217.2
56	19.75	6.11	89	7.91	217.2
57.1	19.69	5.91	85.9	7.86	219
57.1	19.7	5.67	82.5	7.86	219.3
58.1	19.63	5.53	80.3	7.8	220.2
59.1	19.58	5.11	74.1	7.74	223.1
60.2	19.47	4.29	62.1	7.65	228.5
61.2	19.33	2.38	34.3	7.52	233.4
62	19.18	1.26	18.2	7.44	239.1
63	19.12	0.89	12.8	7.39	240.3
64	19.04	0.18	2.6	7.34	239
65	18.98	0	0	7.31	240
66	18.94	0	0	7.26	241.2
67	18.91	0	0	7.24	243.1
67.9	18.88	0	0	7.23	245
69	18.84	0	0	7.22	248.8
69.9	18.79	0	0	7.21	251.5
74.9	18.58	0	0	7.17	274.1	0.93574
79.9	18.27	0	0	7.04	325.7
84.9	18.1	0	0	6.96	350
89.9	18	0	0	6.88	368.6
94.9	17.94	0	0	6.8	383.5	0.642331
96	17.94	0	0	6.81	385.2
97	17.94	0	0	6.81	386.1
